# Supplementary material for: Supercapacitive study for electrode materials around the framework-collapse point of a Ni-based coordination polymer
Source: Royal Society of Chemistry journal article supplement (doi:10.1039/d2ce01236g), 2022-11-09
Supplement: d2ce01236g1.pdf [file d2ce01236g1.pdf]

## **Supercapacitive study for the electrode materials around the framework-collapsed point of Ni-based coordination polymer**

Ye Hong,<sup>a</sup> Tianqi Chen,<sup>a</sup> Hua Wu,<sup>a,b,\*</sup> Changyun Chen,<sup>c,\*</sup> Cheng Zhang,<sup>d</sup> Kuaibing Wang<sup>a,\*</sup>

<sup>a</sup> Department of Chemistry, College of Sciences, Nanjing Agricultural University, Nanjing 210095, P. R. China

<sup>b</sup> College of Resources and Environmental Sciences, Nanjing Agricultural University, Nanjing 210095, P. R. China

<sup>c</sup> Key Laboratory of Advanced Functional Materials of Nanjing, School of Environmental Science, Nanjing Xiaozhuang University, Nanjing, 211171, Jiangsu, P. R. China

<sup>d</sup> Jiangsu Key Laboratory of Micro and Nano Heat Fluid Flow Technology and Energy Application, School of Physical Science and Technology, Suzhou University of Science and Technology, Suzhou, 215009, China

**Corresponding authors:** wuhua@njau.edu.cn (H. Wu); cychen@njxzc.edu.cn (C. Chen); wangkb@njau.edu.cn (K. Wang)

### **Experimental section:**

**Materials.** All chemicals (analytical grade) were purchased from commercial sources and directly used as received. Water was purified with the Millipore system (18.2 MΩ cm).

**Synthesis of Ni-TATB.** 4,4',4''-s-triazine-2,4,6-triyl-tribenzoic acid ( $H_3TATB$ , 2.2052 g, 5 mmol) and  $H_2O$  (50 mL) were mixed at 90 °C. Then slowly added the prepared 3 mol  $L^{-1}$  NaOH solution dropwise until  $pH \approx 7$ , 0.1 mol  $L^{-1}$  sodium triazine solution was successfully prepared. The sodium triazine solution (0.1 mol  $L^{-1}$ , 4 mL), nickel acetate solution (0.1 mol  $L^{-1}$ , 6 mL), ultrapure water (5 mL) and absolute ethanol (5 mL) were introduced into a stainless steel autoclave at 120 °C for 12 h. After cooling down to room temperature, washed with deionized water and absolute ethanol, and vacuum lyophilized to obtain Ni-TATB in a green powder state. FT-IR (KBr pellet,  $cm^{-1}$ ): 3300(s), 2287(w), 1593(s), 1471.5(m), 1313.29(m), 1274(m), 846(w), 796(w), 674(w).

**Preparation of Ni-TATB derivatives.** The Ni-TATB precursor was separately decomposed to the selected calcination temperature at a heating rate of 2 °C  $min^{-1}$  under  $N_2$  atmosphere for 2 h, and the calcination temperature (300 °C, 365 °C, 375 °C, 400 °C) was selected according to the thermogravimetric curve of Ni-TATB. The obtained samples were denoted as Ni-TATB-X (X = 300, 365, 375, 400 correspond to the temperature).

**Material characterization.** The thermogravimetric curve of Ni-TATB was measured by a microcomputer thermogravimetric balance (HTG-1, China), and the heating rate was 10 °C  $min^{-1}$ . The microscopic morphology of the samples was observed by scanning electron microscope (SEM, QUANTA FEG 450, FEI, USA). Ni-TATB was tested by Fourier transform infrared spectrometer (FT-IR, Nicolet 380, Thermo Fisher) in the range of 500  $cm^{-1}$ -4000  $cm^{-1}$  with background subtraction using potassium

bromide. The chemical composition of the material was measured by X-ray powder diffractometer (XRD, MiniFlex600, CuK $\alpha$ ,  $\lambda=0.154$  nm). X-ray photoelectron spectroscopy (XPS, Escalab 250Xi, Thermo Fisher, USA) uses two independent systems equipped with a monochromatic Al K $\alpha$  source to explore the composition, content, chemical state, molecular structure, and chemical bonds of elements in a sample. The micro-regions of the samples were qualitatively and quantitatively analyzed by X-ray energy dispersive analysis (EDS). Gas adsorption-desorption isotherms were measured using a specific surface and porosity analyzer (BET, ASAP 2460, USA) at 77 K using a relative pressure  $P/P_0$  of 0–0.99 and nitrogen as the adsorbate. Pore volume and pore size distribution were estimated by density functional theory (DFT) models, and specific surface areas were determined according to the Brunauer-Emmett-Teller (BET) method. Before the BET test, the Ni-MOFs were evacuated in a closed container and heated at a constant temperature of 80 °C for 4 h. The calcined samples were evacuated in a closed container and heated at a constant temperature of 120 °C for 4 h to remove the surface of the sample. The physical adsorption material was introduced into a closed container with nitrogen gas for 10-15 s.

**Electrochemical tests.** In this experiment, an electrochemical workstation (CHI660E, Shanghai Chenhua) was used to characterize the electrochemical performance in 6M KOH electrolyte, including cyclic voltammetry (CV), galvanostatic charge-discharge curve (GCD) and electrochemical impedance spectroscopy (EIS, a frequency range of 0.01 to 100 kHz.). The electrochemical properties of Ni-TATB and its derivatives as

the working electrode were investigated by a three-electrode configuration, respectively. In the three-electrode test, the platinum wire electrode was used as the counter electrode, the Hg/HgO electrode was used as the reference electrode, and Ni-TATB and its derivatives were used as the positive electrode material [positive electrode active material, acetylene black and polytetrafluoroethylene (PTFE) with 75:15:10 weight ratio, isopropanol as solvent]. The electrochemical properties of the materials were further studied by assembling asymmetric supercapacitors, Ni-TATB and its derivatives were used as the positive material, and commercial activated carbon was used as the negative electrode [negative active material, acetylene black and polyvinylidene fluoride (PVDF) at 75:15:10 weight ratio, N-methyl-2-pyrrolidone (NMP) as solvent], the loading of the positive and negative electrodes should be based on the equation:  $m_{\text{positive}} \times C_{\text{positive}} \times V_{\text{positive}} = m_{\text{negative}} \times C_{\text{negative}} \times V_{\text{negative}}$  [m is the mass of the active material on the electrode (g), C is the specific capacitance ( $\text{F g}^{-1}$ ), V is the potential window (V)].<sup>1</sup>

**Preparation of button battery.** The active material was coated on a carbon cloth with a diameter of 14 mm (the carbon cloth was pretreated with  $\text{HNO}_3$  for 2 h at 80 °C), and Ni-TATB and its derivatives were used as the positive electrode material and activated carbon as the negative electrode material. It consists of a positive electrode shell, positive electrode sheet, two filter paper separators with a diameter of 19 mm, negative electrode sheet, stainless steel gasket, shrapnel, negative electrode shell, 6 mol  $\text{L}^{-1}$  KOH electrolyte, and is sealed by a sealing machine. The specific capacity, energy density and power density of the three-electrode and two-electrode can be

calculated according to the electrochemical performance calculation formulas in the literature.<sup>2</sup>

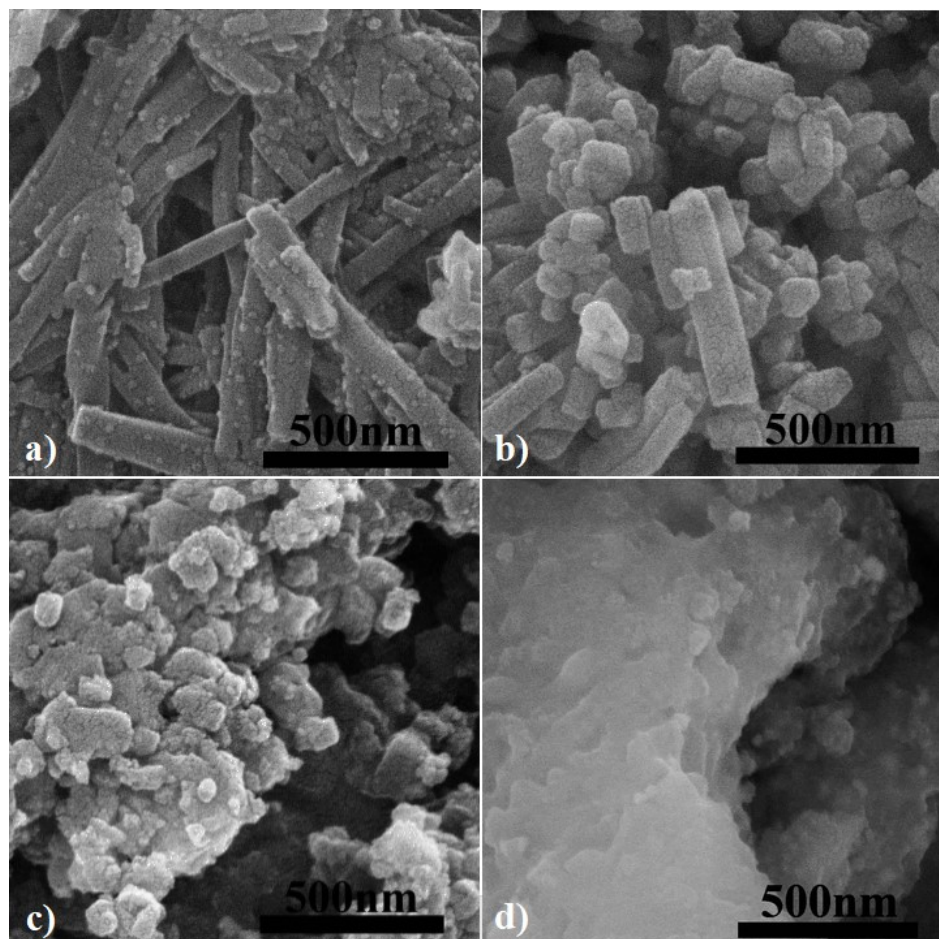

**Figure S1** SEM of a) Ni-TATB -300, b) Ni-TATB-365, c) Ni-TATB-375, d) Ni-TATB-400.

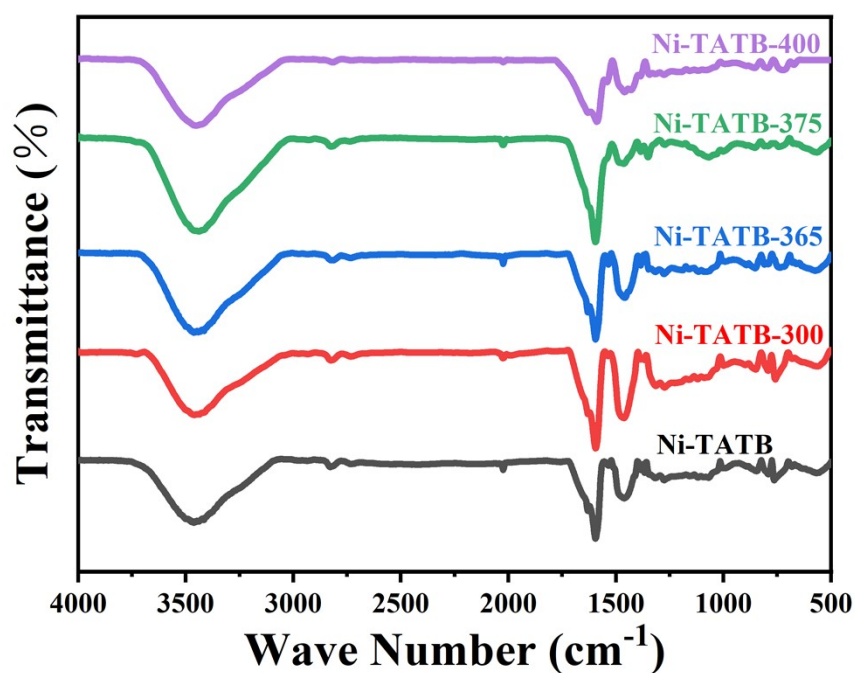

**Figure S2** Comparison of the Infrared spectra of Ni-TATB and its calcined samples.

**Table S1** Elemental composition analysis of Ni-MOF and its calcined samples based on the XPS survey spectra

|             | C 1s (%) | N 1s (%) | O 1s (%) | Ni 2p (%) |
|-------------|----------|----------|----------|-----------|
| Ni-TATB     | 66.35    | 7.65     | 21.13    | 4.88      |
| Ni-TATB-300 | 64.62    | 7.83     | 22.32    | 5.23      |
| Ni-TATB-365 | 66.05    | 9.59     | 17.14    | 7.22      |
| Ni-TATB-375 | 68.82    | 9.50     | 15.30    | 6.39      |
| Ni-TATB-400 | 74.07    | 8.26     | 14.04    | 3.63      |

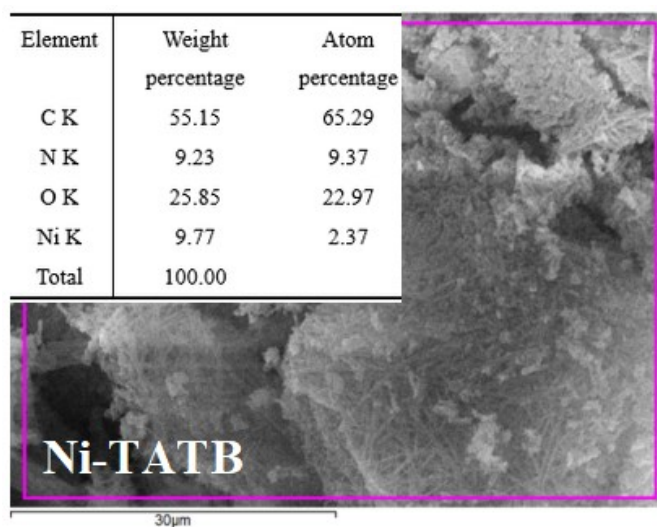

**Figure S3** EDS of Ni-TATB.

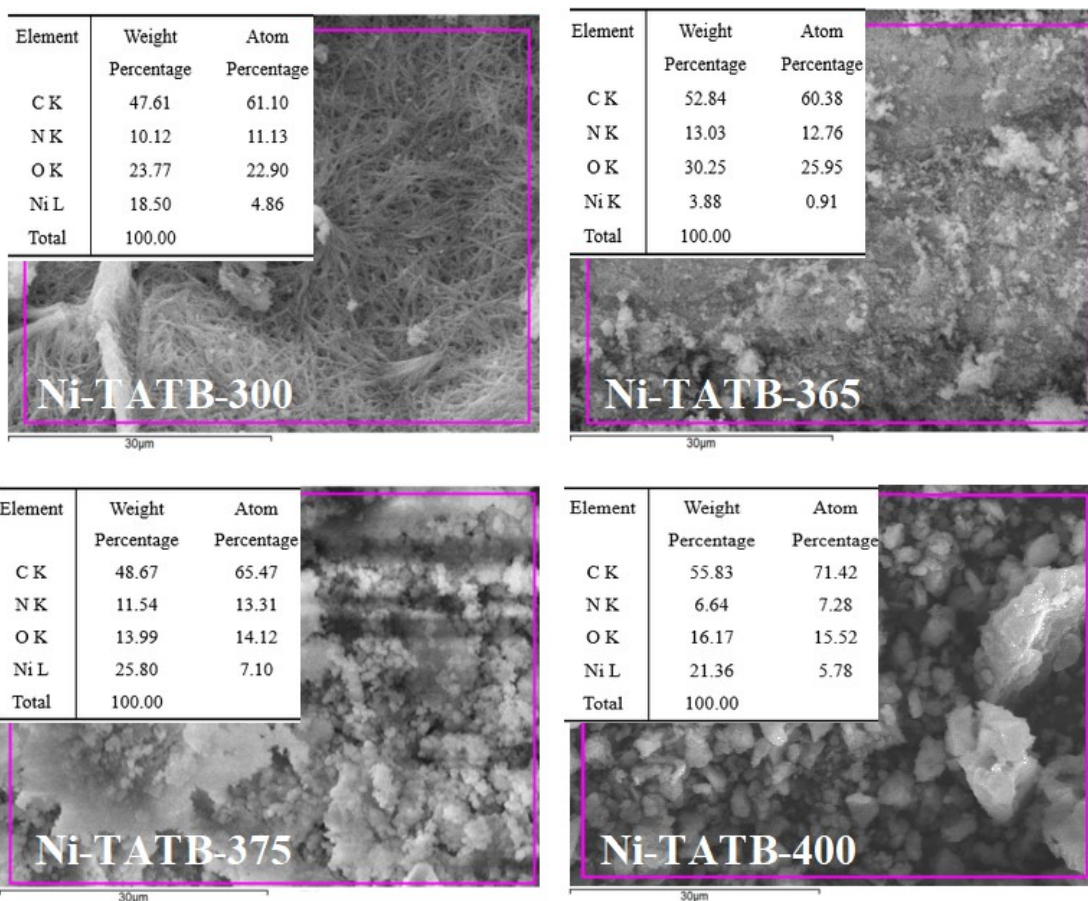

**Figure S4** EDS of Ni-TATB -300, Ni-TATB-365, Ni-TATB-375 and Ni-TATB-400.

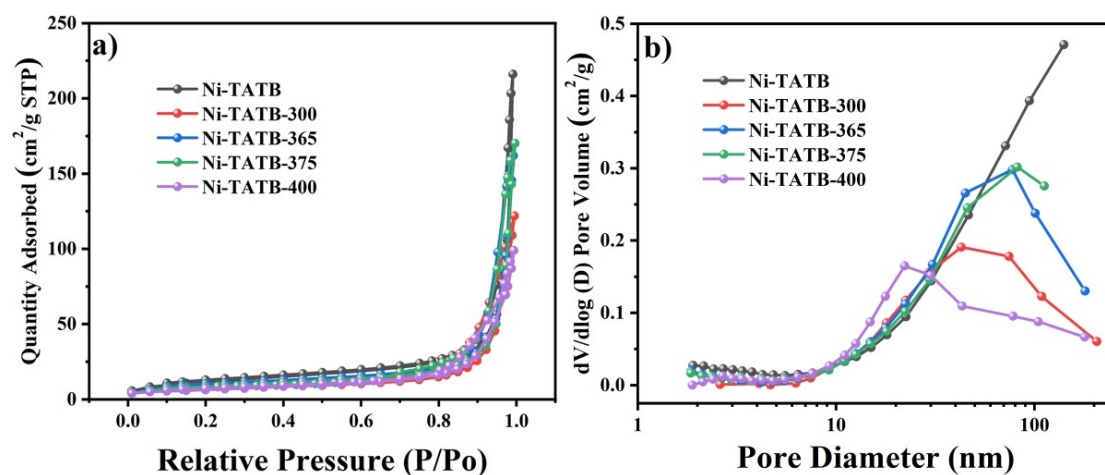

**Figure S5** Nitrogen adsorption-desorption isotherm and pore-size distribution of Ni-TATB and its calcined samples.

**Table S2** Comparison of specific surface area and pore-size of materials

|                                                                                       | Ni-TATB | Ni-TATB-300 | Ni-TATB-365 | Ni-TATB-375 | Ni-TATB-400 |
|---------------------------------------------------------------------------------------|---------|-------------|-------------|-------------|-------------|
| specific surface area (m <sup>2</sup> g <sup>-1</sup> )                               | 42.47   | 23.78       | 38.51       | 31.08       | 22.79       |
| Average pore size (nm)                                                                | 33.74   | 24.21       | 19.70       | 27.27       | 23.43       |
| Pore volume (cm <sup>3</sup> g <sup>-1</sup> , V <sub>total</sub> -V <sub>mic</sub> ) | 0.337   | 0.185       | 0.168       | 0.258       | 0.1527      |



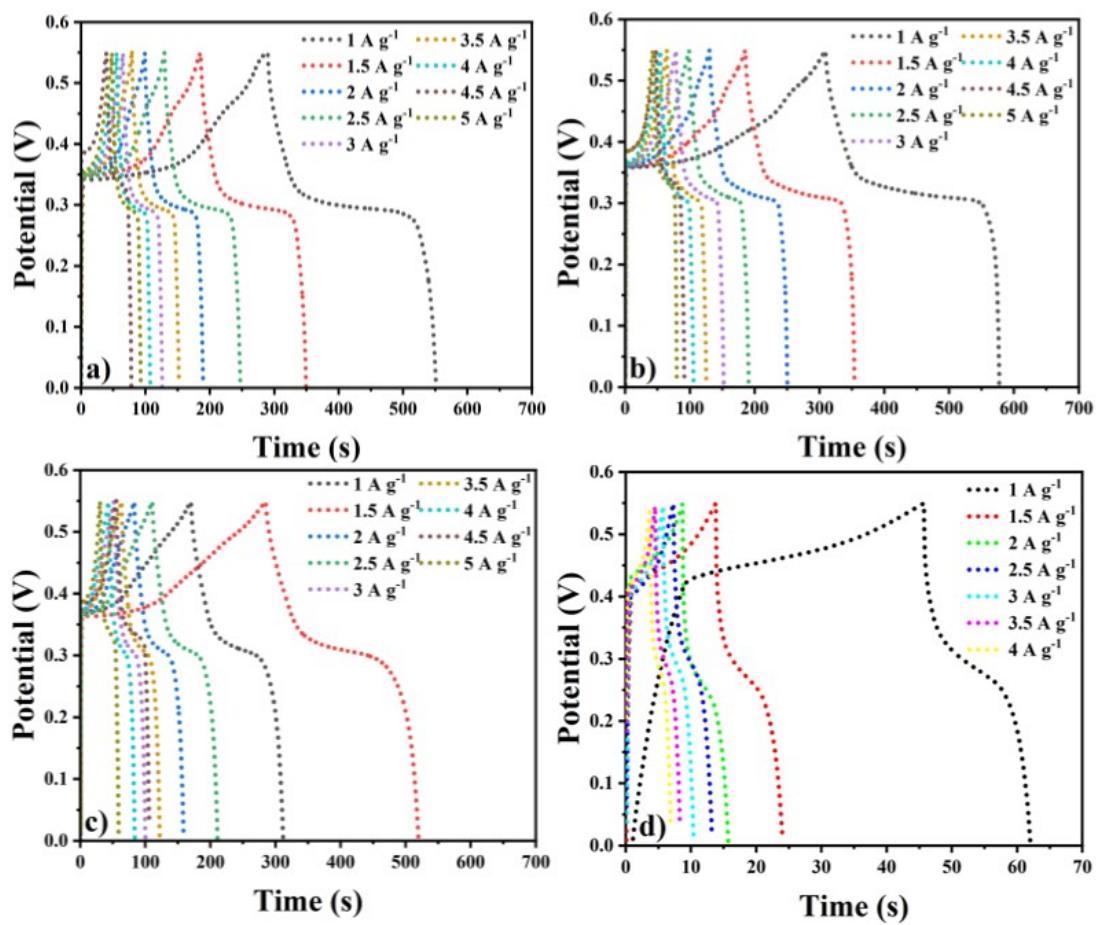

**Figure S6** CP curves of a) Ni-TATB, b) Ni-TATB-300, c) Ni-TATB-375 and d) Ni-TATB-400 at different current densities.

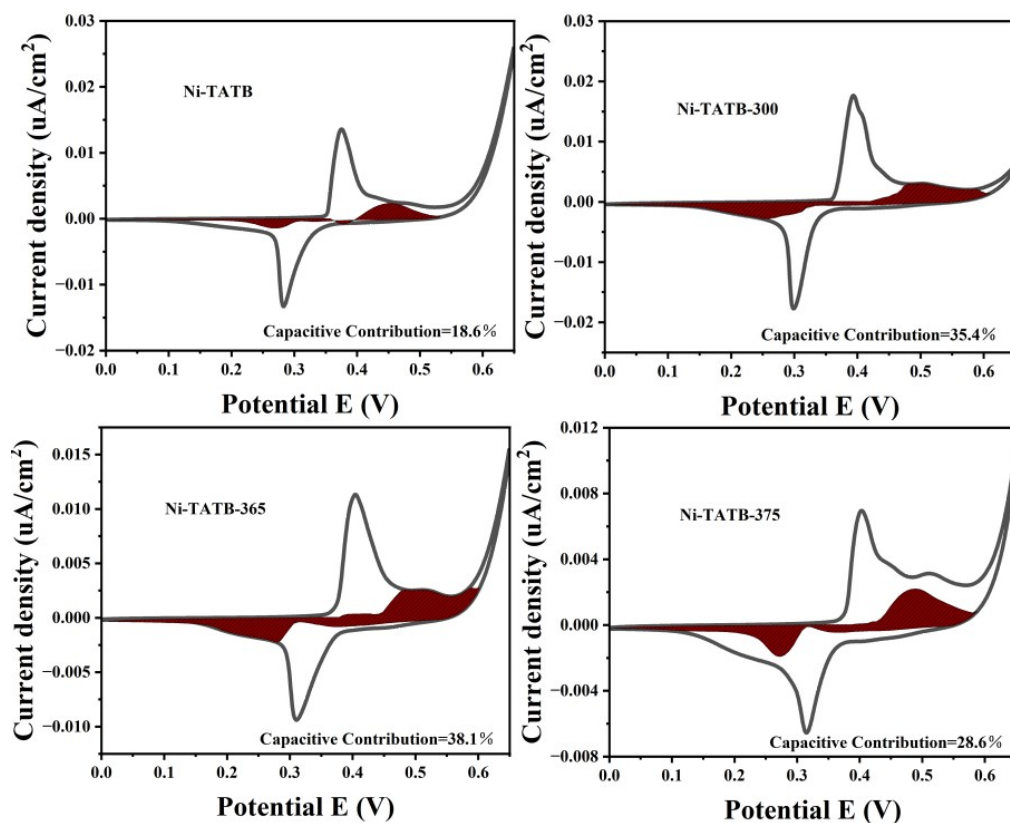

Figure S7 Voltammetric response for the as-prepared Ni-TATB, Ni-TATB-300, Ni-TATB-365,

Ni-TATB-375 electrodes at a sweep rate of  $2 \text{ mV s}^{-1}$

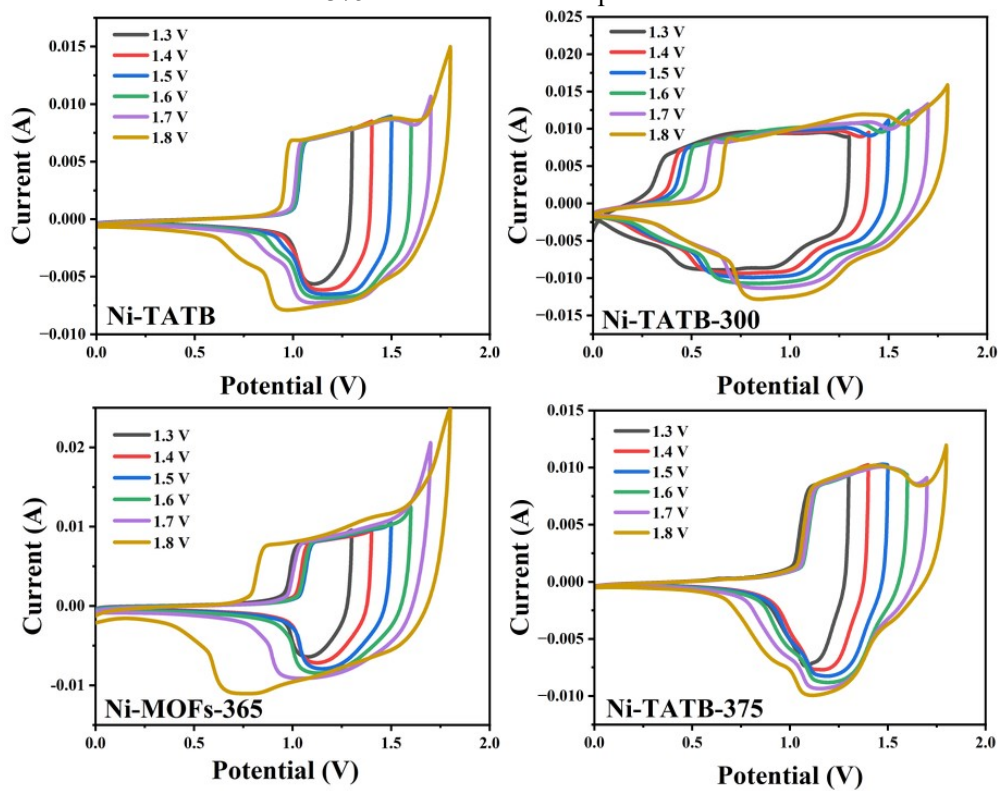

Figure S8 Polarization curve of Ni-TATB//AC, Ni-TATB-300//AC, Ni-TATB-365//AC, Ni-

TATB-375//AC.

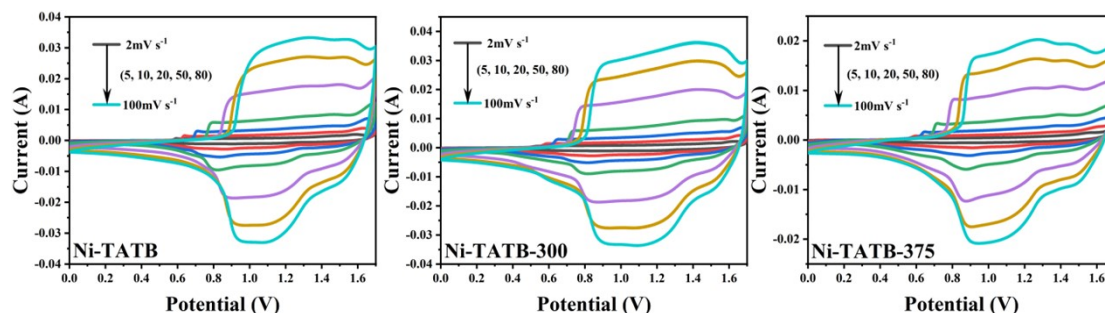

Figure S9 CV curve of Ni-TATB//AC, Ni-TATB-300//AC, Ni-TATB-375//AC devices.

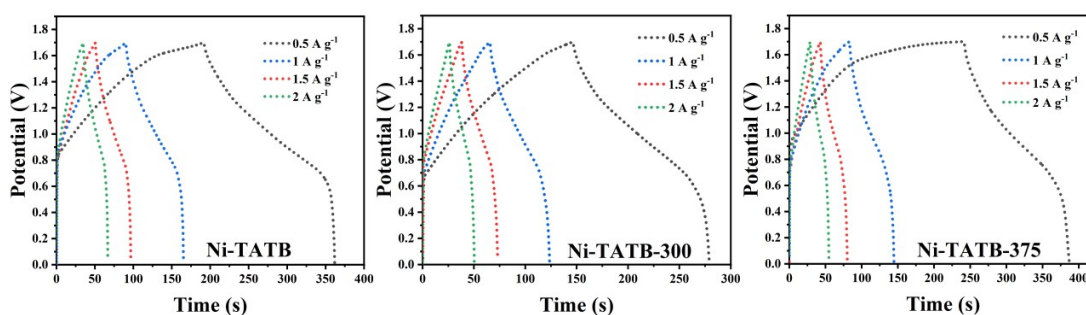

Figure S10 CP curve of Ni-TATB//AC, Ni-TATB-300//AC, Ni-TATB-375//AC devices.

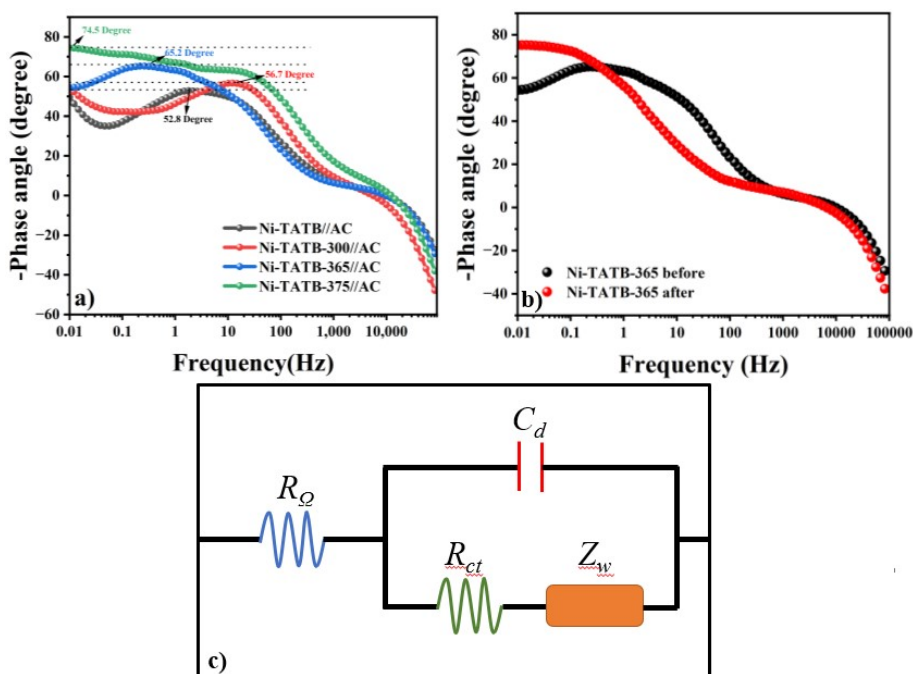

Figure S11 a) Bode phase angle for Ni-TATB//AC, Ni-TATB-300, Ni-TATB-365, Ni-TATB-375//AC devices; b) Bode phase angle for Ni-TATB-365 before and after the 5000 charge-discharge cycles; c) equivalent circuit diagram.

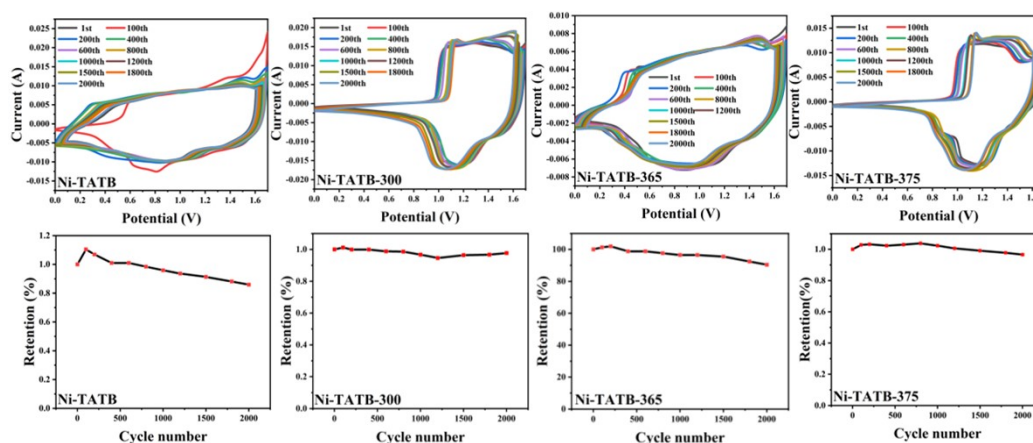

**Figure S12** CV circle test for Ni-TATB//AC, Ni-TATB-300, Ni-TATB-365, Ni-TATB-375//AC devices at  $30 \text{ mV s}^{-1}$  for 2000 cycles.

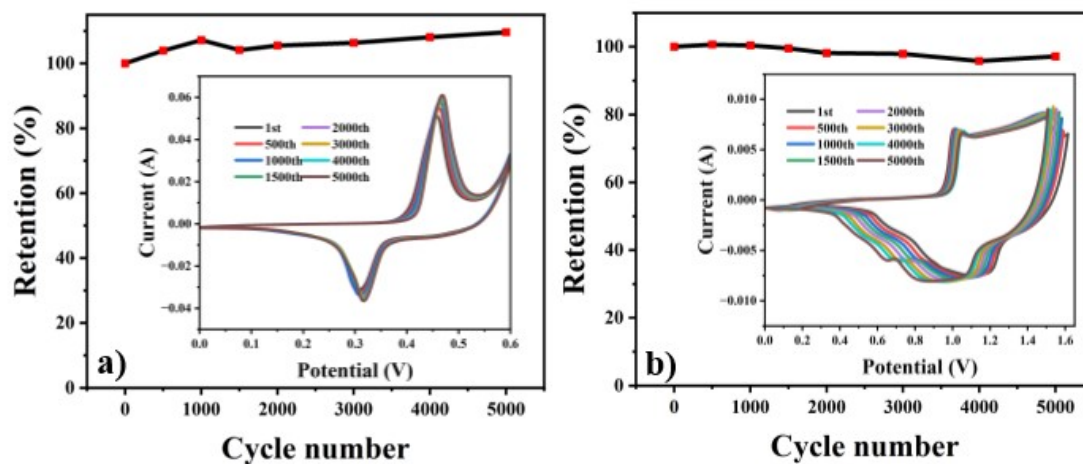

**Figure S13** a) CV circle test for Ni-TATB-365 at  $30 \text{ mV s}^{-1}$  for 5000 cycles; b) CV circle test for Ni-TATB-365//AC device at  $30 \text{ mV s}^{-1}$  for 5000 charge-discharge cycles.

## References:

- 1 K. B. Wang, S. E. Wang, J. D. Liu, Y. X. Guo, F. F. Mao, H. Wu, Q. C. Zhang, *Acs Appl. Mater. Inter.*, 2021, **13**, 15315-15323.
- 2 NLW Septiani, Y. V. Kaneti, K. B. Fathoni, J. Wang, Y. Ide, B. Yulianto, Nugraha, H. K. Dipojono, A. K. Nanjundan, D. Golberg, Y. Bando and Y. Yamauchi, *Nano. Energy*, 2020, **67**, 104270.
